# Supplementary material for: Impact of Oxidative Stress and Protein S-Glutathionylation in Aortic Valve Sclerosis Patients with Overt Atherosclerosis
Source: PubMed Central journal article supplement (PMC6517913; doi:10.3390/jcm8040552), 2019-04-24
Supplement: jcm-08-00552-s001.pdf [file jcm-08-00552-s001.pdf]

Supplemental Figure S1.

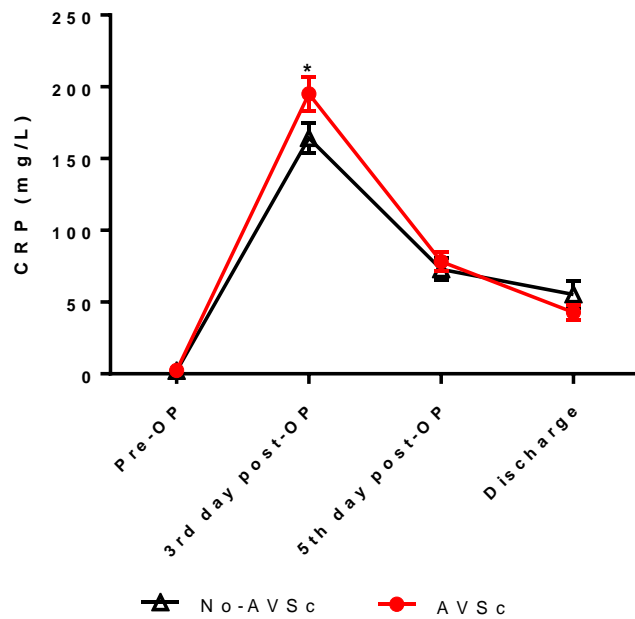

**Systemic inflammation status.** Graph representing C-reactive protein (CRP) levels measured in clinical routine preoperatively, at 3<sup>rd</sup>-day post-surgery, at 5<sup>th</sup>-day post-surgery, and at discharge. Black line denotes patients with normal aortic valve leaflets (No-AVSc; n = 29), while red line denotes patients with increase aortic valve leaflet thickness (AVSc; n = 29). \* p < 0.05.

Supplemental Figure S2.

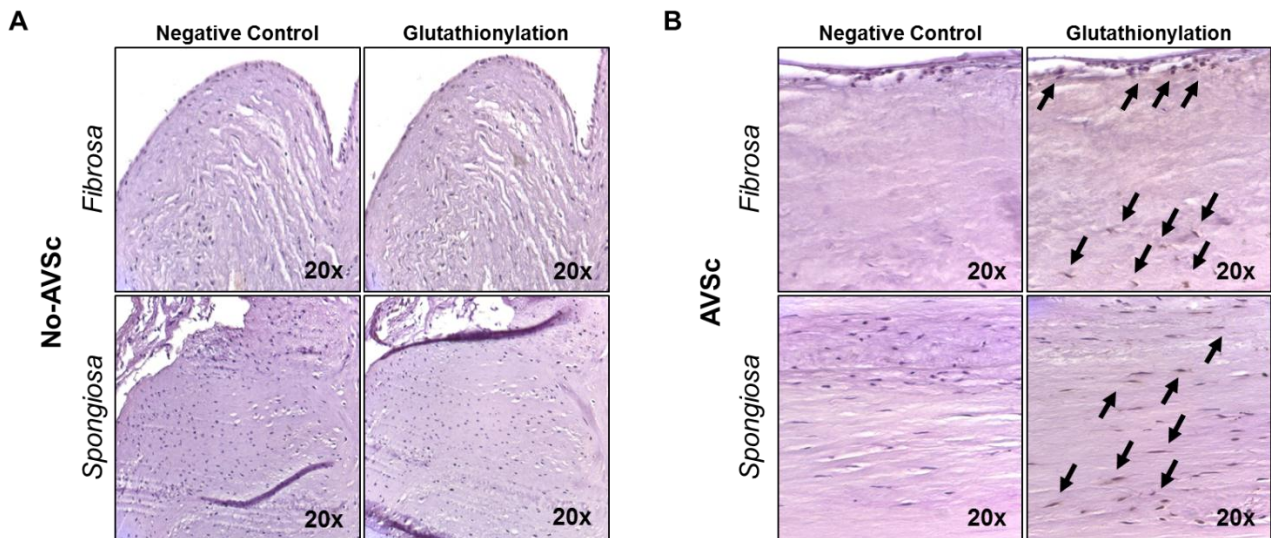

**Protein S-glutathionylation in aortic valve leaflets. (A-B)** Immunohistochemistry showing glutathione (GSH) expression in *Fibrosa* and *Spongiosa* layers of the aortic valve (A) in patients with normal aortic valve leaflets (No-AVSc) and (B) in patients with increased aortic valve leaflets thickness (AVSc). Black arrows indicate positive cells for GSH staining.

Supplemental Figure S3.

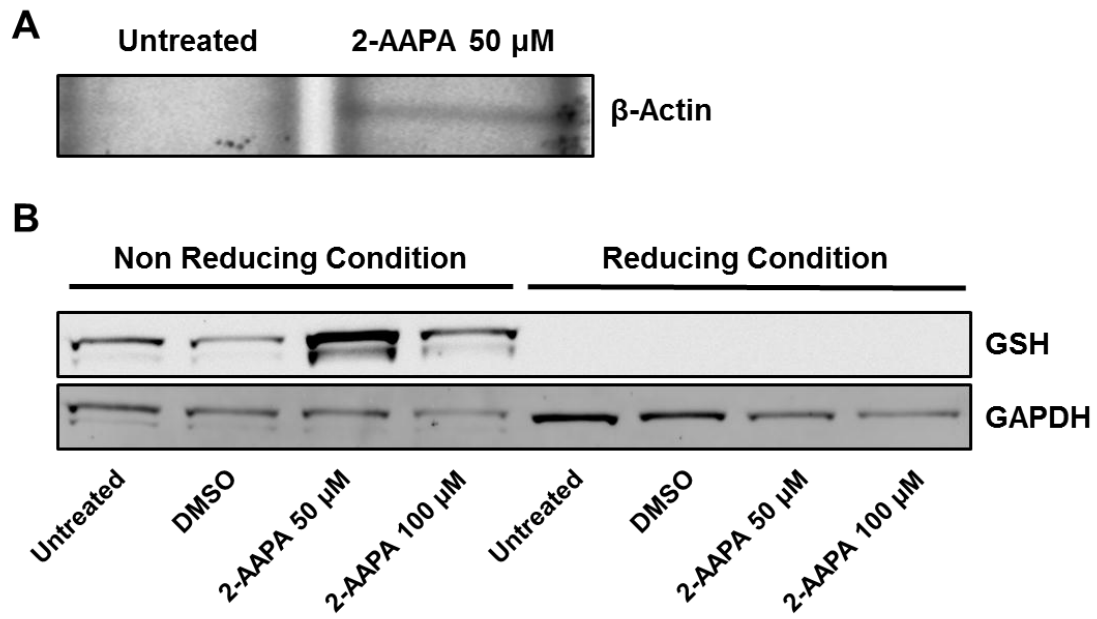

**S-Glutathionylation of  $\beta$ -actin.** (A) Immunoprecipitation of glutathione (GSH) and Western blot for  $\beta$ -actin in HUVEC treated with 2-AAPA 50  $\mu$ M for 4 hours and 24 hours of recovery. (B) Western blot showing GSH in non-reducing and in reducing conditions in HUVEC untreated, treated with DMSO, 2-AAPA 50  $\mu$ M, and 2-AAPA 100  $\mu$ M.

Supplemental Figure S4.

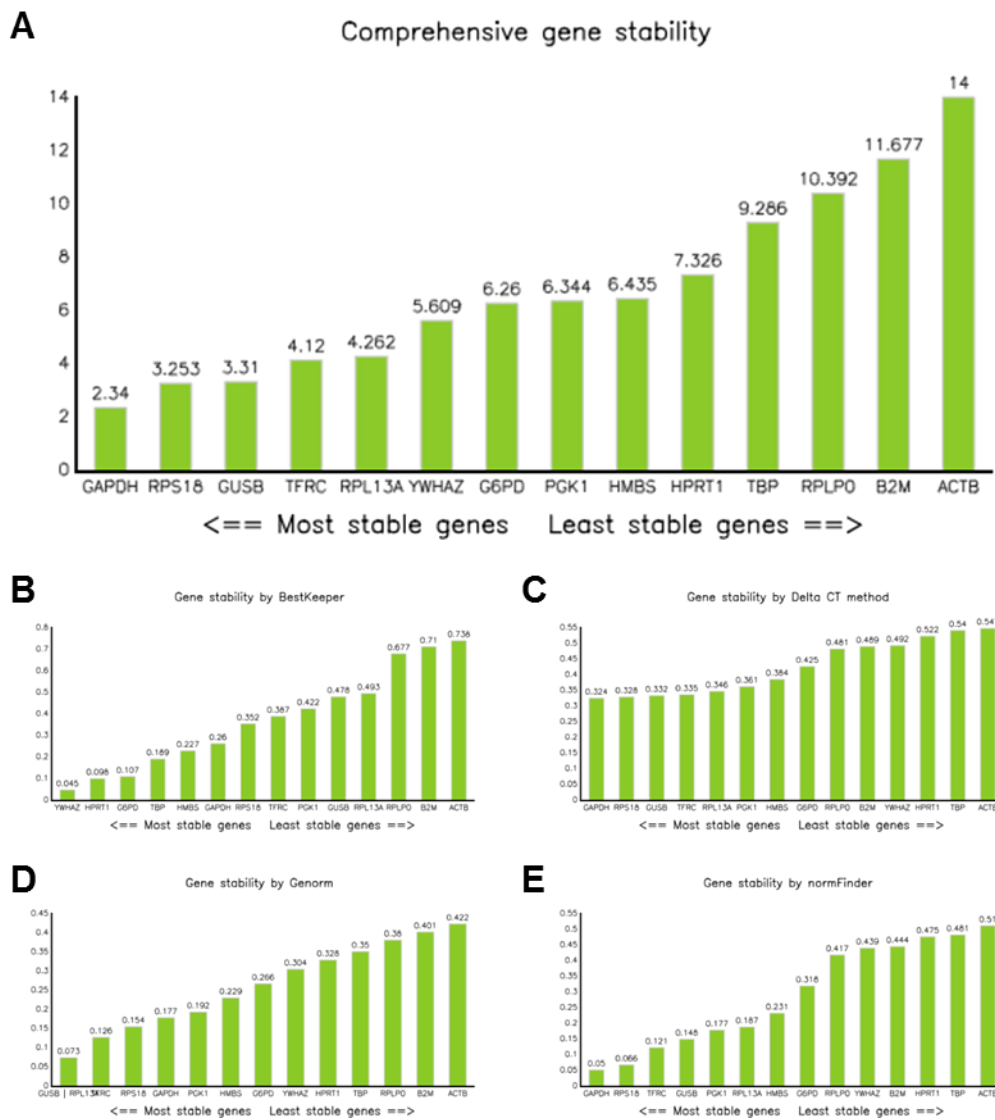

**Comprehensive gene stability.** (A) Histograms showing the evaluation of comprehensive gene stability comparing untreated vs. 2-AAPA 50  $\mu$ M cells ( $n = 3$ ) assessed by following different algorithm: (B) Bestkeeper; (C) Delta CT method; (D) Genom; and (E) Normfinder.
